# Supplementary material for: Effect of contrail overlap on radiative impact attributable to aviation contrails
Source: Copernicus journal article supplement (doi:10.5194/acp-2020-181), 2020-05-05
Supplement: Supplementary file 1 [file acp-2020-181-supplement.pdf]

# Effect of contrail overlap on radiative impact attributable to aviation contrails

Inés Sanz-Morère<sup>1</sup>, Sebastian D. Eastham<sup>1</sup>, Florian Allroggen<sup>1</sup>, Raymond L. Speth<sup>1</sup>, Steven R. H. Barrett<sup>1</sup>

<sup>1</sup>Laboratory for Aviation and the Environment, Massachusetts Institute of Technology, Cambridge, MA 02139, United States of America

*Corresponding author: Sebastian Eastham (seastham@mit.edu)*

## Supplementary Information

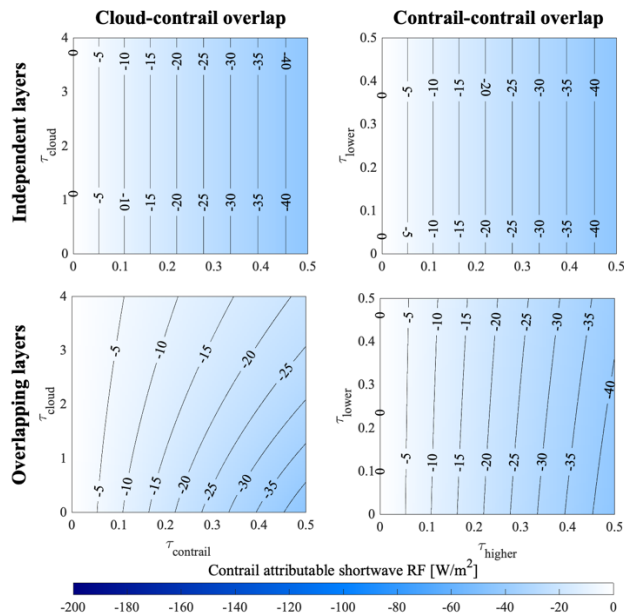

**Figure S1.** Effect of overlaps on contrail-attributable  $RF_{SW}$  as a function of the optical depth  $\tau$  of each layer. Left: system contrail-contrail; right: system cloud-contrail. Negative RF is shown in blue and positive RF is shown in red. Lower and upper contrail properties are the following: asymmetry parameter of 0.77, temperature of 220 K and 215 K respectively. Cloud properties are the following: asymmetry parameter of 0.85, temperature of 260 K. The solar zenith angle ( $\theta$ ) is held at  $45^\circ$  for all cases.

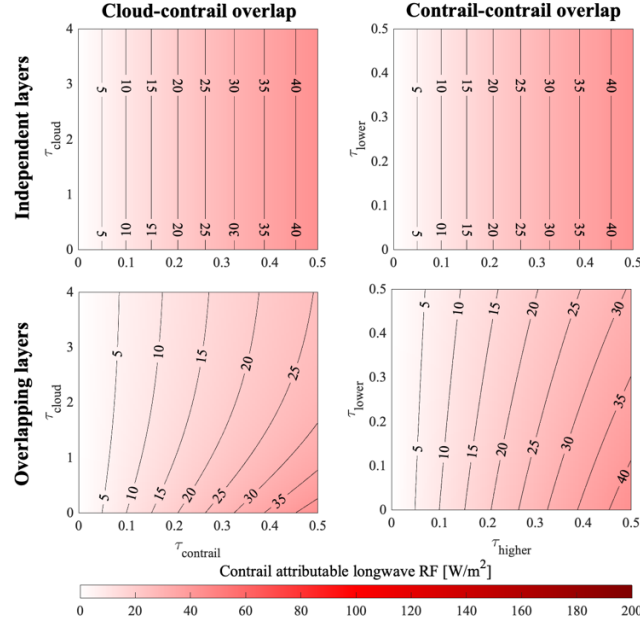

**Figure S2.** Effect of overlaps on system  $RF_{LW}$  varying with optical depth  $\tau$ . Same properties as Fig. S1.

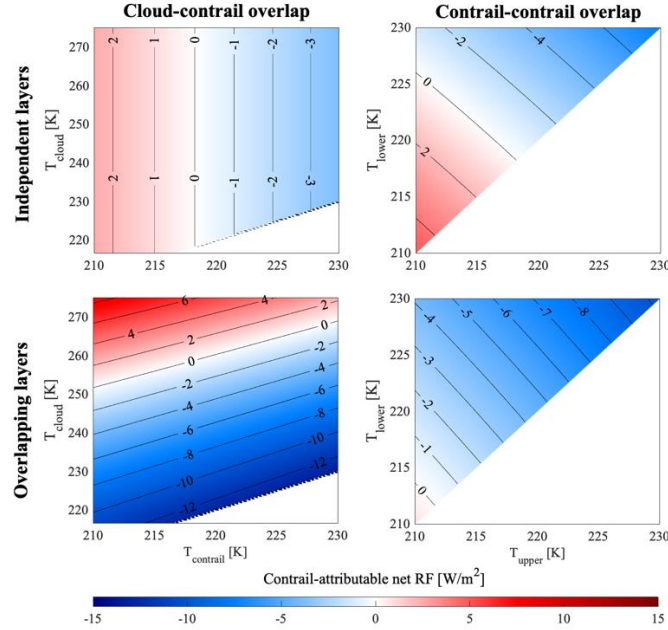

20

**Figure S3.** Effect of overlaps on system net RF varying with layer temperature. Left: system contrail-contrail; right: system cloud-contrail. Negative RF is shown in blue and positive RF is shown in red. Lower and upper contrail properties are the following: asymmetry parameter of 0.77, optical depth of 0.3. Cloud properties are the following: asymmetry parameter of 0.85, optical depth of 3. Fixed  $\theta = 45^\circ$ . Cases where the upper layer is warmer than the lower are not shown.

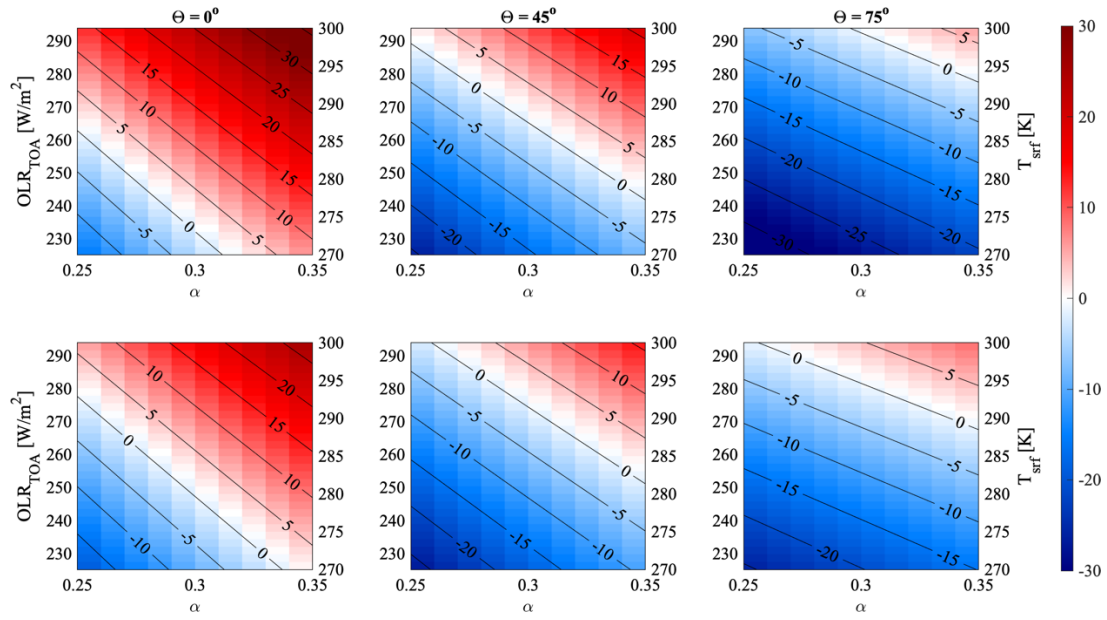

**Figure S4.** System contrail-contrail net RF in  $\text{W/m}^2$ , varying with local conditions (solar zenith angle  $\theta$  increasing from left to right, outgoing longwave radiation and Earth surface temperature  $T_{\text{surf}}$  (based on Corti and Peter, 2009) and albedo  $\alpha$ ). Upper row: system RF when contrails considered independent. Lower row: system RF when accounting for total overlap. Negative RF is shown in blue and positive RF is shown in red. Lower and upper contrail properties are the following: asymmetry parameter of 0.77, optical depth of 0.3, temperature of 220 K and 215 K respectively.

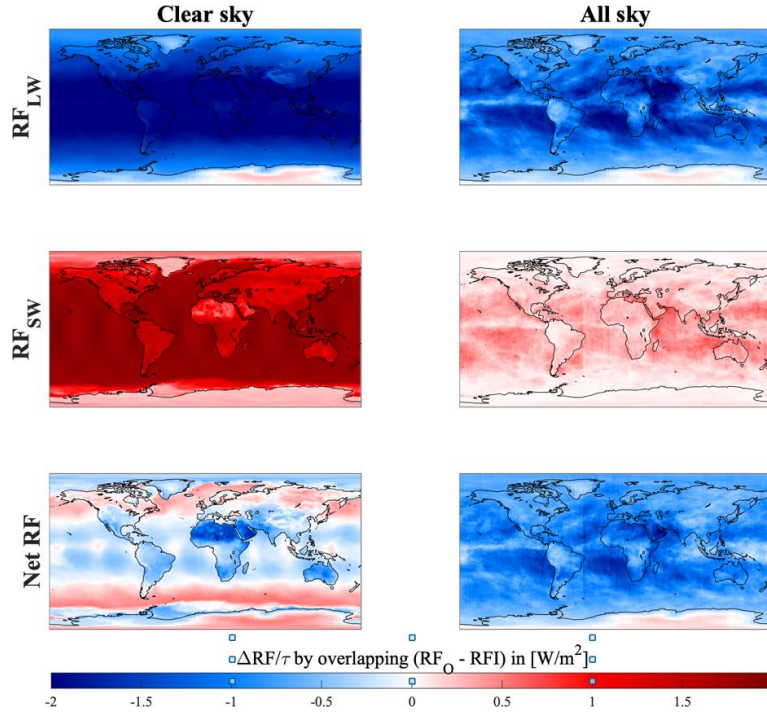

**Figure S5.** Global sensitivity to contrail-contrail overlap ( $\text{RF} = \text{RF}_O - \text{RF}_I$ )
